# Supplementary material
Source: PubMed Central journal article supplement (PMC4714708)

Supplemental Figure A. Intensive care unit acquired pneumonia and mortality occurrence by sex for all patients, and stratified by trauma and non-trauma patient status

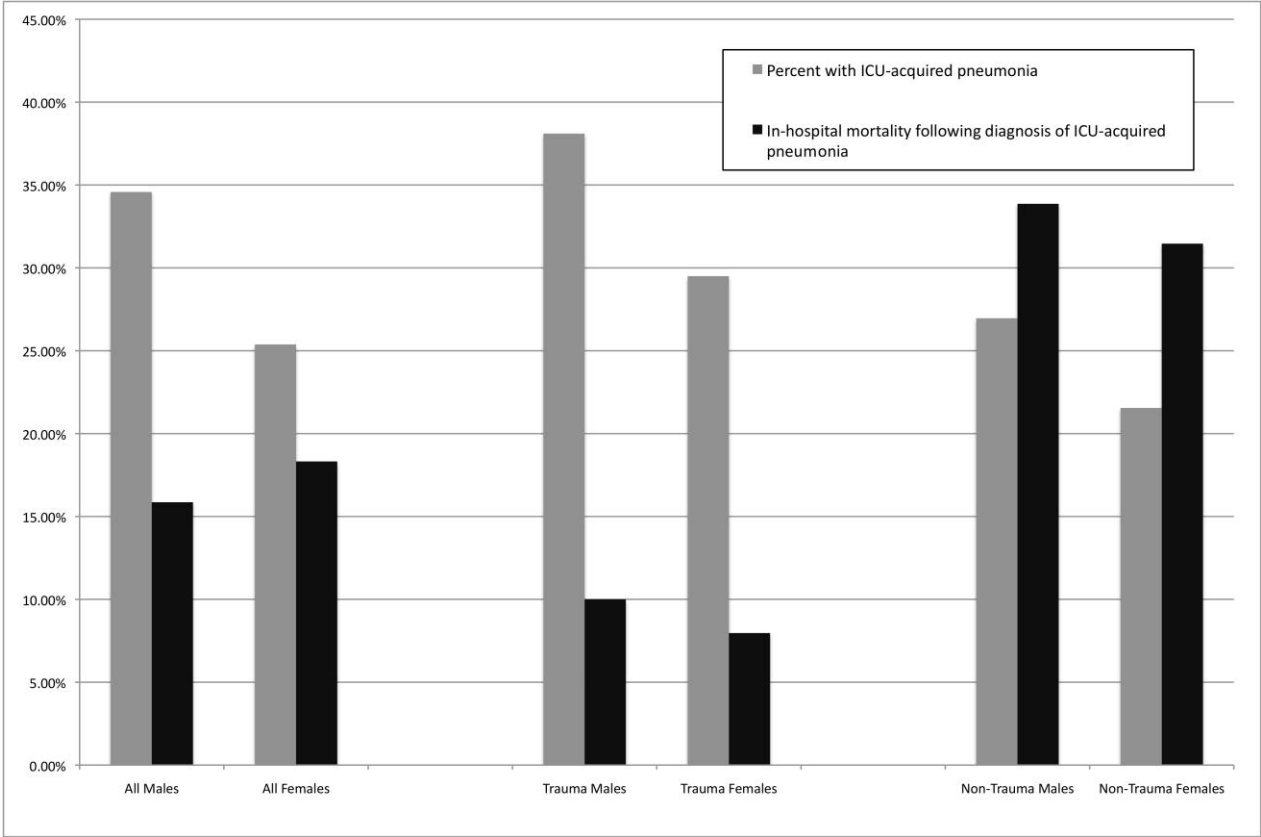

Supplemental Figure B. Mortality for trauma patients by age group, stratified by patient sex

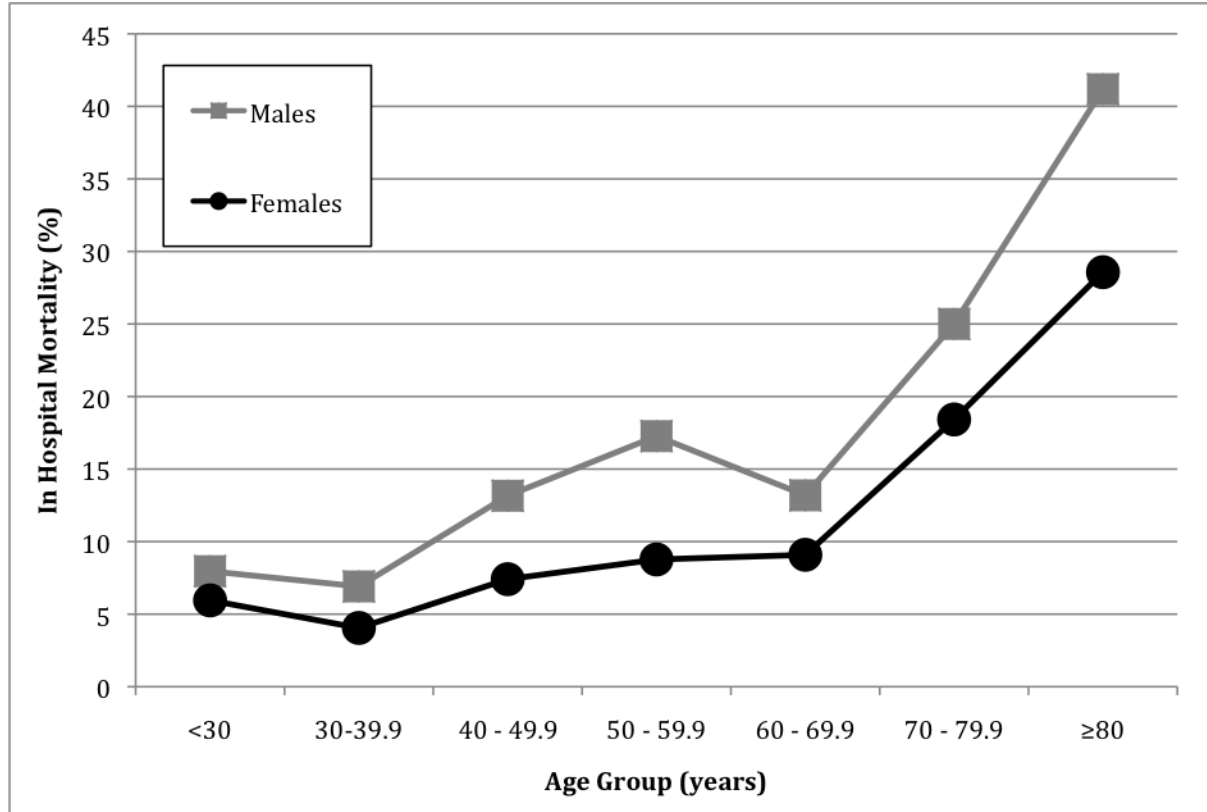

Supplemental Figure C. Mortality for non-trauma patients by age group, stratified by patient sex

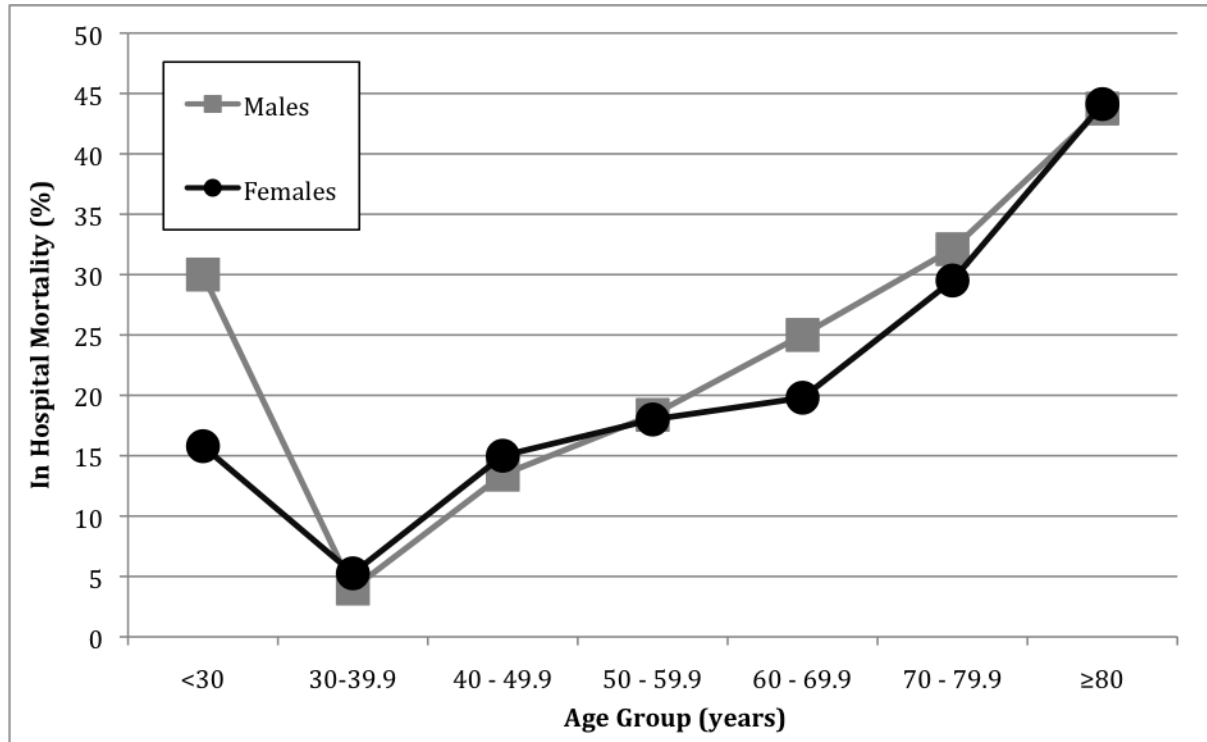

Supplement: NIHMS747673-supplement-SFigures.pdf [file NIHMS747673-supplement-SFigures.pdf]
