# Supplementary material
Source: PubMed Central journal article supplement (PMC4714708)
Supplement: NIHMS747673-supplement-STables.pdf [file NIHMS747673-supplement-STables.pdf]

Supplemental Table A. Comparison between study sites for demographics and severity of illness scores, stratified by trauma and non-trauma patient status

|                                | Trauma      |             |         | Non-Trauma  |             |         |
|--------------------------------|-------------|-------------|---------|-------------|-------------|---------|
|                                | UVA (n=386) | VU (n=1021) | P value | UVA (n=393) | VU (n=491)  | P value |
| Female sex                     | 113 (29.3)  | 270 (26.4)  | 0.29    | 176 (44.8)  | 237 (48.3)  | 0.30    |
| Age, years                     | 46.2 ± 19.6 | 42.6 ± 18.1 | 0.0018  | 57.9 ± 15.0 | 59.1 ± 14.3 | 0.21    |
| Race                           |             |             |         |             |             |         |
| White, non-Hispanic            | 304 (78.8)  | 856 (83.8)  | 0.016   | 322 (81.9)  | 430 (87.6)  | 0.062   |
| Black                          | 47 (29.4)   | 113 (11.1)  |         | 53 (13.5)   | 47 (9.6)    |         |
| Other                          | 35 (9.1)    | 52 (5.1)    |         | 18 (4.6)    | 14 (2.9)    |         |
| WHO score at ICU admission     | 0.24 ± 0.67 | 0.15 ± 0.52 | 0.025   | 1.35 ± 1.12 | 1.19 ± 1.19 | 0.044   |
| McCabe score at ICU admission  | 0.21 ± 0.45 | 0.23 ± 0.47 | 0.49    | 1.28 ± 0.84 | 0.93 ± 0.58 | <0.0001 |
| APACHE II score                | 13.3 ± 6.2  | 17.2 ± 6.0  | <0.0001 | 18.8 ± 7.2  | 19.2 ± 6.4  | 0.49    |
| MOD score                      | 4.9 ± 4.2   | 8.2 ± 3.0   | <0.0001 | 4.7 ± 4.5   | 9.2 ± 3.7   | <0.0001 |
| Injury severity score          | 24.2 ± 11.4 | 31.4 ± 12.2 | <0.0001 | -           | -           |         |
| Probability of trauma survival | 0.66 ± 0.35 | 0.70 ± 0.31 | 0.13    | -           | -           |         |
| In hospital mortality          | 26 (6.7)    | 139 (13.6)  | 0.0003  | 89 (22.7)   | 104 (21.2)  | 0.060   |

Abbreviations: UVA, University of Virginia Health System; VU, Vanderbilt University Medical Center; WHO, World Health Organization; APACHE, acute physiology and chronic health evaluation; MOD, Marshall or multiple organ dysfunction  
 Values reported as N (%) for categorical variables, mean ± standard deviation for continuous variables

Supplemental Table B. Expanded baseline patient characteristics of 2291 patients admitted for surgical/trauma intensive care

|                                                                        | Trauma            |                    |             | Non-Trauma       |                    |         |
|------------------------------------------------------------------------|-------------------|--------------------|-------------|------------------|--------------------|---------|
|                                                                        | Males<br>(n=1024) | Females<br>(n=383) | P<br>Value* | Males<br>(n=471) | Females<br>(n=413) | P Value |
| Age, mean (SD), years                                                  | 42.2 (18.1)       | 47.0 (19.4)        | <0.0001     | 59.4 (13.5)      | 57.7 (15.8)        | 0.082   |
| Race, No. (%)                                                          |                   |                    |             |                  |                    |         |
| White                                                                  | 826 (80.7)        | 334 (87.2)         | 0.016       | 397 (84.3)       | 355 (86.0)         | 0.73    |
| Black                                                                  | 128 (12.5)        | 32 (8.4)           |             | 57 (12.1)        | 43 (10.4)          |         |
| Other                                                                  | 70 (6.8)          | 17 (4.4)           |             | 17 (3.6)         | 15 (3.6)           |         |
| Pre-ICU admission medical history, No. (%)                             |                   |                    |             |                  |                    |         |
| No listed comorbidities                                                | 679 (66.3)        | 220 (57.4)         | 0.0021      | 54 (11.5)        | 48 (11.6)          | 0.94    |
| Diabetes mellitus                                                      | 74 (7.2)          | 41 (10.7)          | 0.034       | 131 (27.8)       | 121 (29.3)         | 0.63    |
| Cardiac disease                                                        | 122 (11.9)        | 54 (14.1)          | 0.27        | 161 (34.3)       | 127 (30.8)         | 0.27    |
| Cerebrovascular disease                                                | 26 (2.5)          | 14 (3.7)           | 0.26        | 40 (8.5)         | 38 (9.2)           | 0.72    |
| Pulmonary disease                                                      | 96 (9.3)          | 42 (11.0)          | 0.37        | 113 (24.0)       | 108 (26.2)         | 0.47    |
| Chronic renal insufficiency                                            | 12 (1.2)          | 4 (1.0)            | 1.0         | 65 (13.8)        | 36 (8.7)           | 0.017   |
| Dialysis dependence                                                    | 2 (0.2)           | 3 (0.8)            | 0.13        | 30 (6.4)         | 17 (4.1)           | 0.13    |
| HIV/AIDS                                                               | 4 (0.4)           | 0 (0)              | 0.58        | 1 (0.2)          | 2 (0.5)            | 0.60    |
| Malignancy                                                             | 26 (2.5)          | 8 (2.1)            | 0.62        | 141 (30.0)       | 81 (19.6)          | 0.0004  |
| Hepatic dysfunction                                                    | 39 (3.8)          | 11 (2.9)           | 0.40        | 104 (22.1)       | 57 (13.8)          | 0.0034  |
| Hyperlipidemia                                                         | 34 (3.3)          | 18 (4.7)           | 0.22        | 37 (7.9)         | 38 (9.2)           | 0.48    |
| Hypertension                                                           | 188 (18.4)        | 90 (23.5)          | 0.032       | 228 (48.5)       | 209 (50.6)         | 0.53    |
| Peripheral vascular disease                                            | 21 (2.0)          | 8 (1.8)            | 0.79        | 52 (11.1)        | 34 (8.2)           | 0.16    |
| Rheumatic/connective tissue disorder                                   | 7 (0.7)           | 11 (2.9)           | 0.0025      | 9 (1.9)          | 19 (4.6)           | 0.023   |
| Thyroid disease                                                        | 12 (1.2)          | 16 (4.2)           | 0.0003      | 23 (4.9)         | 58 (14.0)          | <0.0001 |
| Chronic corticosteroid use                                             | 8 (0.8)           | 7 (1.8)            | 0.14        | 37 (7.9)         | 38 (9.2)           | 0.48    |
| Inflammatory bowel disease                                             | 1 (0.1)           | 1 (0.3)            | 0.47        | 12 (2.6)         | 27 (6.5)           | 0.0040  |
| Menopausal status, No. (%)                                             |                   |                    |             |                  |                    |         |
| Premenopausal                                                          | -                 | 170 (44.4)         | -           | -                | 72 (17.4)          | -       |
| Perimenopausal                                                         | -                 | 59 (15.4)          | -           | -                | 53 (12.8)          | -       |
| Postmenopausal                                                         | -                 | 154 (40.2)         | -           | -                | 288 (69.7)         | -       |
| Solid organ transplants, No. (%)                                       |                   |                    |             |                  |                    |         |
| Any solid organ transplant                                             | 2 (0.2)           | 1 (0.3)            | 1.0         | 80 (17.0)        | 50 (12.1)          | 0.041   |
| Kidney alone                                                           | 1 (0.1)           | 0 (0)              | 1.0         | 13 (2.8)         | 7 (1.8)            | 0.30    |
| Liver alone                                                            | 0 (0)             | 1 (0.3)            | 0.27        | 66 (14.4)        | 39 (9.8)           | 0.040   |
| Pancreas alone                                                         | 0 (0)             | 0 (0)              | -           | 0 (0)            | 0 (0)              | -       |
| Kidney/pancreas                                                        | 1 (0.1)           | 0 (0)              | 1.0         | 1 (0.1)          | 0 (0)              | 0.54    |
| Kidney/liver                                                           | 0 (0)             | 0 (0)              | -           | 0 (0)            | 3 (0.8)            | 0.10    |
| Other organ (e.g., heart, lung)                                        | 0 (0)             | 0 (0)              | -           | 2 (0.4)          | 1 (0.3)            | 1.0     |
| NIH weight classification, No. (%)                                     |                   |                    |             |                  |                    |         |
| Underweight (BMI < 18.5)                                               | 11 (1.2)          | 12 (3.7)           | 0.0006      | 18 (4.2)         | 23 (6.0)           | <0.0001 |
| Normal weight (BMI 18.5 – 24.9)                                        | 307 (34.3)        | 119 (36.7)         |             | 135 (31.2)       | 111 (28.8)         |         |
| Overweight (BMI 25.0– 29.9)                                            | 317 (35.4)        | 86 (26.5)          |             | 133 (30.7)       | 80 (20.8)          |         |
| Obese (BMI 30.0 – 39.9)                                                | 211 (23.6)        | 76 (23.5)          |             | 111 (25.6)       | 97 (25.2)          |         |
| Extremely obese (BMI ≥ 40)                                             | 50 (5.6)          | 31 (9.6)           |             | 37 (8.5)         | 74 (19.2)          |         |
| Trauma mechanism, No. (%)                                              |                   |                    |             |                  |                    |         |
| Blunt                                                                  | 879 (86.9)        | 353 (93.9)         | 0.0002      | -                | -                  | -       |
| Penetrating                                                            | 133 (13.1)        | 23 (6.1)           |             | -                | -                  | -       |
| Abode prior to admission, No. (%)                                      |                   |                    |             |                  |                    |         |
| Home                                                                   | 1004 (98.1)       | 372 (97.1)         | 0.30        | 416 (85.7)       | 416 (88.3)         | 0.25    |
| Skilled nursing facility                                               | 2 (0.5)           | 1 (0.1)            | 0.18        | 19 (4.6)         | 11 (2.3)           | 0.064   |
| Patients with infections present at the time of ICU admission, No. (%) | 66 (6.4)          | 24 (6.3)           | 0.90        | 167 (35.5)       | 164 (39.7)         | 0.19    |
| WHO score at ICU admission, mean (SD)                                  | 0.15 (0.52)       | 0.25 (0.65)        | 0.0093      | 1.3 (1.2)        | 1.2 (1.2)          | 0.56    |
| McCabe score at ICU admission, mean (SD)                               | 0.22 (0.46)       | 0.24 (0.47)        | 0.43        | 1.2 (0.8)        | 1.0 (0.7)          | <0.0001 |
| APACHE II score, mean (SD)                                             | 15.9 (6.4)        | 16.8 (5.9)         | 0.012       | 19.6 (6.9)       | 18.4 (6.5)         | 0.013   |
| MOD score, mean (SD)                                                   | 7.5 (3.6)         | 7.2 (3.6)          | 0.16        | 7.8 (4.7)        | 7.0 (4.5)          | 0.015   |
| Injury severity score, mean (SD)                                       | 30.2 (12.5)       | 29.7 (12.0)        | 0.55        | -                | -                  | -       |
| Probability of trauma survival, mean (SD)                              | 0.68 (0.32)       | 0.71 (0.30)        | 0.26        | -                | -                  | -       |
| DNR status at time of ICU admission, No. (%)                           | 11 (1.1)          | 3 (0.8)            | 0.77        | 9 (1.9)          | 7 (1.7)            | 0.81    |

Abbreviations: ICU, intensive care unit; HIV/AIDS: human immunodeficiency virus/acquired immunodeficiency syndrome; BMI, body mass index; MOD, Marshall or multiple organ dysfunction; WHO, World Health Organization; APACHE, acute physiology and chronic health evaluation; DNR, do not resuscitate; SD, standard deviation; NIH, National Institutes of Health

\*Student's t-test for continuous variables; Chi-squared test or Fisher's Exact Test for categorical variables

**Supplemental Table C.** Pre-admission factors, outcomes, and their relationship to gender and the acquisition of an infection while in the intensive care unit. Values are either differences or risk ratios comparing patients with and without ICU-acquired infections

|                                                         | All Patients          | Trauma               |                      | Non-Trauma              |                      |
|---------------------------------------------------------|-----------------------|----------------------|----------------------|-------------------------|----------------------|
|                                                         | (n=2293)              | Male (n=1024)        | Female (n=383)       | Male (n=471)            | Female (n=413)       |
| Age, mean difference (95% CI), years                    | -1.51 (-3.04 – 0.024) | 0.21 (-2.01 – 2.44)  | -2.01 (-5.95 – 1.92) | -3.88 (-6.33 – -1.43) * | -0.88 (-3.95 – 2.17) |
| Race, RR (95% CI)                                       |                       |                      |                      |                         |                      |
| White, non-Hispanic                                     | 0.98 (0.87 – 1.10)    | 0.93 (0.79 – 1.08)   | 0.95 (0.68 – 1.33)   | 0.95 (0.73 – 1.25)      | 1.30 (0.91 – 1.87)   |
| Black                                                   | 1.00 (0.87 – 1.15)    | 1.10 (0.91 – 1.32)   | 1.02 (0.67 – 1.53)   | 0.95 (0.68 – 1.31)      | 0.74 (0.49 – 1.13)   |
| Other                                                   | 1.06 (0.87 – 1.28)    | 1.02 (0.79 – 1.31)   | 1.10 (0.65 – 1.84)   | 1.35 (0.89 – 2.04)      | 0.87 (0.46 – 1.63)   |
| Pre-ICU Admission Medical History, RR (95% CI)          |                       |                      |                      |                         |                      |
| No comorbidities                                        | 1.04 (0.92 – 1.17)    | 1.15 (0.92 – 1.43)   | 0.90 (0.60 – 1.34)   | 1.05 (0.84 – 1.31)      | 1.04 (0.83 – 1.31)   |
| Diabetes mellitus                                       | 0.97 (0.87 – 1.09)    | 0.92 (0.75 – 1.14)   | 0.94 (0.66 – 1.32)   | 1.23 (1.01 – 1.51) *    | 0.83 (0.65 – 1.06)   |
| Cardiac disease                                         | 1.03 (0.92 – 1.17)    | 1.23 (1.02 – 1.48)   | 0.99 (0.69 – 1.44)   | 0.93 (0.72 – 1.19)      | 0.99 (0.78 – 1.26)   |
| Pulmonary disease                                       | 0.83 (0.66 – 1.05)    | 1.05 (0.59 – 1.86)   | 0.58 (0.11 – 3.17)   | 0.90 (0.65 – 1.23)      | 0.71 (0.44 – 1.14)   |
| Chronic renal insufficiency                             | 1.34 (1.11 – 1.58) *  | 1.32 (0.77 – 2.26)   | 0.99 (0.42 – 2.35)   | 1.61 (1.25 – 2.06) *    | 1.23 (0.91 – 1.68)   |
| Chronic corticosteroid use                              | 1.06 (0.97 – 1.17)    | 1.15 (0.99 – 1.34)   | 0.94 (0.71 – 1.24)   | 1.09 (0.89 – 1.34)      | 1.07 (0.87 – 1.33)   |
| Hypertension                                            | 0.86 (0.72 – 1.02)    | 1.19 (0.89 – 1.59)   | 0.41 (0.12 – 1.46)   | 0.82 (0.62 – 1.07)      | 0.78 (0.55 – 1.12)   |
| Hepatic dysfunction                                     | 1.06 (0.92 – 1.21)    | 0.97 (0.64 – 1.47)   | 0.58 (0.17 – 1.92)   | 1.19 (0.97 – 1.47)      | 1.07 (0.83 – 1.38)   |
| Solid organ transplant, RR (95% CI)                     | 0.80 (0.63 – 1.00) *  | - <sup>#</sup>       | -                    | 0.82 (0.61 – 1.12)      | 0.81 (0.56 – 1.18)   |
| Menopausal status, RR (95% CI)                          |                       |                      |                      |                         |                      |
| Premenopausal                                           | -                     | -                    | 1.10 (0.87 – 1.38)   | -                       | 0.89 (0.66 – 1.20)   |
| Perimenopausal                                          | -                     | -                    | 1.07 (0.79 – 1.46)   | -                       | 1.33 (1.03 – 1.72) * |
| Postmenopausal                                          | -                     | -                    | 0.87 (0.60 – 1.11)   | -                       | 0.91 (0.73 – 1.14)   |
| NIH weight classification, RR (95% CI)                  |                       |                      |                      |                         |                      |
| Underweight (BMI < 18.5)                                | 0.77 (0.55 – 1.08)    | 0.80 (0.36 – 1.75)   | 0.67 (0.30 – 1.53)   | 0.94 (0.54 – 1.62)      | 0.68 (0.35 – 1.30)   |
| Normal weight (BMI 18.5 – 24.9)†                        | 1.00                  | 1.00                 | 1.00                 | 1.00                    | 1.00                 |
| Overweight (BMI 25.0– 29.9)                             | 0.99 (0.90 – 1.14)    | 1.13 (0.96 – 1.32)   | 0.80 (0.58 – 1.10)   | 0.86 (0.65 – 1.12)      | 1.08 (0.80 – 1.47)   |
| Obese (BMI 30.0 – 39.9)                                 | 1.04 (0.92 – 1.18)    | 1.15 (0.96 – 1.37)   | 0.80 (0.57 – 1.11)   | 1.00 (0.77 – 1.31)      | 1.08 (0.80 – 1.44)   |
| Extremely obese (BMI ≥ 40)                              | 1.09 (0.93 – 1.28)    | 1.00 (0.72 – 1.38)   | 1.11 (0.77 – 1.60)   | 0.97 (0.70 – 1.49)      | 1.20 (0.89 – 1.61)   |
| Trauma Mechanism, RR (95% CI)                           |                       |                      |                      |                         |                      |
| Blunt†                                                  | 1.00                  | 1.00                 | 1.00                 | -                       | -                    |
| Penetrating                                             | 1.04 (0.88 – 1.24)    | 1.07 (0.89 – 1.29)   | 0.79 (0.45 – 1.40)   | -                       | -                    |
| Abode prior to admission, RR (95%CI)                    |                       |                      |                      |                         |                      |
| Home†                                                   | 1.00                  | 1.00                 | 1.00                 | 1.00                    | 1.00                 |
| Skilled nursing facility                                | 1.04 (0.73 – 1.48)    | -                    | 1.16 (0.29 – 4.64)   | 1.18 (0.68 – 2.04)      | 0.98 (0.61 – 1.60)   |
| WHO score at ICU admission, mean difference (95% CI)    | -0.48 (-0.13 – 0.04)  | -0.02 (-0.08 – 0.05) | 0.02 (-0.12 – 0.15)  | -0.20 (-0.41 – 0.016)   | 0.06 (-0.17 – 0.30)  |
| McCabe score at ICU Admission, mean difference (95% CI) | -0.01 (-0.07 – 0.05)  | 0.03 (-0.03 – 0.09)  | 0.01 (-0.12 – 0.09)  | -0.60 (-0.20 – 0.08)    | 0.01 (-0.13 – 0.14)  |
| APACHE II score, mean difference (95% CI)               | 1.62 (1.08 – 2.16) *  | 2.02 (1.25 – 2.80) * | 1.80 (0.62 – 2.97) * | 1.20 (-0.06 – 2.46)     | 1.28 (0.02 – 2.55) * |
| MOD score, mean difference (95% CI)                     | 0.82 (0.48 – 1.16) *  | 0.83 (0.38 – 1.28) * | 0.79 (0.02 – 1.55) * | 0.77 (-0.12 – 1.67)     | 0.92 (0.00 – 1.84) * |
| Injury severity score, mean difference                  | 2.67 (1.24 – 4.09) *  | 2.83 (1.14 – 4.51) * | 2.18 (-0.49 – 4.86)  | -                       | -                    |

|                                                             |                      |                      |                       |                      |                       |
|-------------------------------------------------------------|----------------------|----------------------|-----------------------|----------------------|-----------------------|
| (95% CI)                                                    |                      |                      |                       |                      |                       |
| Probability of trauma survival, mean difference (95% CI), % | -3.64 (-7.73 – 0.40) | -3.22 (-8.06 – 1.6)  | -4.53 (-12.2 – 3.1)   | -                    | -                     |
| DNR status at time of ICU admission, RR (95% CI)            | 0.73 (0.44 – 1.21)   | 0.38 (0.11 – 1.33)   | 1.55 (0.69 – 3.49)    | 0.25 (0.04 – 1.58)   | 1.58 (0.97 – 2.55)    |
| Blood cell product transfusion, RR (95% CI)                 | 1.10 (0.99 – 1.23)   | 1.16 (0.97 – 1.36)   | 1.07 (0.81 – 1.40)    | 0.93 (0.73 – 1.19)   | 1.19 (0.93 – 1.54)    |
| Required mechanical ventilation, RR (95% CI)                | 1.19 (1.00 – 1.42)   | 1.61 (1.11 – 2.33) * | 1.28 (0.80 – 2.06)    | 0.94 (0.70 – 1.28)   | 1.01 (0.74 – 1.39)    |
| Length of stay, mean difference (95% CI), days              |                      |                      |                       |                      |                       |
| ICU length of stay                                          | 8.95 (7.42 – 10.5) * | 8.53 (7.41 – 9.66)*  | 7.93 (6.39 – 9.47) *  | 12.0 (9.94 – 14.1) * | 7.59 (0.007 – 15.1) * |
| Hospital length of stay                                     | 11.3 (8.65 – 13.9) * | 10.4 (6.88 – 14.0)*  | 10.1 (6.98 – 13.2) *  | 13.8 (7.74 – 20.0) * | 12.0 (3.52 – 20.4) *  |
| Mortality, RR (95% CI)                                      | 1.19 (1.07 – 1.33) * | 0.98 (0.81 – 1.20)*  | 0.78 (0.49 – 1.25)    | 1.50 (1.22 – 1.83) * | 1.50 (1.22 – 1.85) *  |
| Live patient discharge disposition, RR (95% CI)             |                      |                      |                       |                      |                       |
| Home, No. (%)†                                              | 1.00                 | 1.00                 | 1.00                  | 1.00                 | 1.00                  |
| Rehabilitation facility                                     | 1.56 (1.37 – 1.78) * | 1.39 (1.17 – 1.66)*  | 1.53 (1.09 – 2.16) *  | 1.62 (1.15 – 2.28) * | 1.92 (1.37 – 2.70) *  |
| Skilled nursing facility                                    | 1.40 (1.18 – 1.66) * | 1.36 (1.08 – 1.72) * | 1.24 (0.77 – 1.97)    | 1.56 (1.04 – 2.33) * | 1.49 (0.99 – 2.25)    |
| Hospital                                                    | 1.35 (1.14 – 1.60) * | 1.11 (0.87 – 1.41)   | 1.04 (0.64 – 1.68)    | 1.78 (1.22 – 2.54) * | 2.23 (1.55 – 3.23) *  |
| Functional status at discharge                              |                      |                      |                       |                      |                       |
| WHO functional status, mean (SD)                            | 0.37 (0.28 - 0.47) * | 0.30 (0.17 - 0.43) * | 0.33 (0.11 - 0.54) *  | 0.47 (0.24 - 0.69) * | 0.47 (0.24 - 0.70) *  |
| Change In WHO functional status from admission, Mean (SD)   | 0.45 (0.33 – 0.58) * | 0.31 (0.16 – 0.45) * | 0.33 (0.095 – 0.56) * | 0.61 (0.31 – 0.91) * | 0.40 (0.11 – 0.70) *  |

Abbreviations: ICU, intensive care unit; SD, standard deviation; CI, confidence interval; RR, relative risk or risk ratio; BMI, body mass index; MOD, Marshall or multiple organ dysfunction; WHO, World Health Organization; APACHE, acute physiology and chronic health evaluation; DNR, do not resuscitate; NIH, National Institutes of Health

\* Significant differences between those who developed or did not develop an ICU acquired infection

# Risk ratios are not calculated if all events occurred in one group

† Referent group

Shaded values are those with significant differences between patients with and without ICU-acquired infections

**Supplemental Table D.** Pre-admission factors, outcomes, and their relationship to sex and all-cause in-hospital mortality. Values are either differences or risk ratios comparing patients not surviving or surviving to hospital discharge

|                                                             | All Patients     | Trauma           |                   | Non-Trauma        |                  |
|-------------------------------------------------------------|------------------|------------------|-------------------|-------------------|------------------|
|                                                             | (n=2292)         | Male (n=1024)    | Female (n=383)    | Male (n=471)      | Female (n=413)   |
| Age, mean difference (95% CI), years                        | 11 (9-13)*       | 10 (7 – 14)*     | 12 (5.6 – 19)*    | 6.4 (3.6 – 9.3)*  | 7.7 (4.0 – 11)*  |
| Race, RR (95% CI)                                           |                  |                  |                   |                   |                  |
| White, non-Hispanic †                                       | 1.0              | 1.0              | 1.0               | 1.0               | 1.0              |
| Black                                                       | 1.2 (0.8 – 1.9)  | 0.6 (0.3 – 1.1)  | 1.0 (0.3 – 3.0)   | 1.2 (0.8 – 1.9)   | 0.9 (0.5 – 1.7)  |
| Other                                                       | 0.7 (0.4 – 1.2)  | 0.4 (0.2 – 1.1)  | #                 | 1.9 (1.0 – 3.5)*  | 1.0 (1.0 – 3.4)  |
| Pre-ICU Admission Medical History, RR (95% CI)              |                  |                  |                   |                   |                  |
| No comorbidities                                            | 0.5 (0.4 – 0.6)* | 0.5 (0.4 – 0.7)* | 0.6 (0.3 – 1.1)   | 0.2 (0.07 – 0.7)* | 1.1 (0.7 – 2.0)  |
| Diabetes mellitus                                           | 1.1 (0.9 – 1.5)  | 1.7 (1.0 – 2.7)* | 1.1 (0.4 – 2.9)   | 0.7 (0.4 – 1.0)   | 1.1 (0.9 – 1.4)  |
| Cardiac disease                                             | 1.9 (1.6 – 2.4)* | 2.4 (1.7 – 3.4)* | 2.4 (1.2 – 4.8)*  | 1.4 (1.0 – 1.9)   | 1.3 (0.9 – 1.9)  |
| Pulmonary disease                                           | 1.2 (1.0 – 1.6)  | 1.3 (0.8 – 2.1)  | 1.7 (0.7 – 3.8)   | 0.9 (0.6 – 1.4)   | 1.0 (0.6 – 1.5)  |
| Chronic renal insufficiency                                 | 1.8 (1.3 – 2.5)* | 3.4 (1.7 – 6.7)* | 5.7 (2.0 – 16)*   | 1.1 (0.7 – 1.7)   | 1.2 (0.7 – 2.3)  |
| Chronic corticosteroid use                                  | 2.2 (1.6 – 3.0)* | 2.0 (0.6 – 6.7)  | 3.3 (1.0 – 11)    | 1.9 (1.2 – 2.9)*  | 1.3 (0.7 – 2.3)  |
| Hypertension                                                | 1.2 (1.0 – 1.5)  | 1.3 (0.9 – 1.9)  | 1.7 (0.9 – 3.3)   | 0.8 (0.6 – 1.1)   | 0.9 (0.6 – 1.3)  |
| Hepatic dysfunction                                         | 1.8 (1.4 – 2.3)* | 2.8 (1.7 – 4.5)* | 1.0 (0.2 – 6.6)   | 1.4 (1.0 – 2.0)   | 0.8 (0.5 – 1.5)  |
| Malignancy                                                  | 2.1 (1.7 – 2.6)* | 0.9 (0.3 – 2.7)  | 4.4 (1.7 – 11)*   | 1.7 (1.3 – 2.4)*  | 1.4 (0.9 – 2.2)  |
| Solid organ transplant, RR (95% CI)                         | 1.5 (1.1 – 2.1)* |                  | 11 (8.2 – 16)*    | 1.0 (0.7 – 1.6)   | 1.0 (0.5 – 1.8)  |
| Menopausal status, RR (95% CI)                              |                  |                  |                   |                   |                  |
| Premenopausal †                                             | -                | -                | 1.0               | -                 | 1.0              |
| Perimenopausal                                              | -                | -                | 4.3 (1.6 – 11.6)* | -                 | 1.6 (0.6 – 4.0)  |
| Postmenopausal                                              | -                | -                | 3.7 (1.5 – 8.9)*  | -                 | 2.5 (1.2 – 5.2)* |
| NIH weight classification, RR (95% CI)                      |                  |                  |                   |                   |                  |
| Underweight (BMI < 18.5)                                    | 1.4 (0.9 – 2.3)  | 0.8 (0.1 – 5.4)  | 1.7 (0.4 – 6.5)   | 1.4 (0.7 – 2.9)   | 0.9 (0.4 – 2.2)  |
| Normal weight (BMI 18.5 – 24.9) †                           | 1.0              | 1.0              | 1.0               | 1.0               | 1.0              |
| Overweight (BMI 25.0– 29.9)                                 | 1.1 (0.8 – 1.4)  | 1.1 (0.7 – 1.7)  | 1.0 (0.9 – 1.1)   | 1.1 (0.7 – 1.6)   | 1.0 (0.6 – 1.7)  |
| Obese (BMI 30.0 – 39.9)                                     | 1.0 (0.7 – 1.2)  | 1.1 (0.6– 1.5)   | 1.0 (0.5 – 2.4)   | 1.0 (0.6 – 1.5)   | 0.8 (0.5 – 1.4)  |
| Extremely obese (BMI ≥ 40)                                  | 0.8 (0.5 – 1.2)  | 1.6 (0.8 – 3.1)  | -                 | 0.3 (0.1 – 1.1)   | 0.7 (0.4 – 1.3)  |
| Trauma mechanism, RR (95% CI)                               |                  |                  |                   |                   |                  |
| Blunt†                                                      | 1.0              | 1.0              | 1.0               | -                 | -                |
| Penetrating                                                 | 0.8 (0.5 – 1.3)  | 0.6 (0.3 – 1.0)  | 2.6 (1.1 – 6.0)*  | -                 | -                |
| Abode prior to admission, RR (95%CI)                        |                  |                  |                   |                   |                  |
| Home†                                                       | 1.0              | 1.0              | 1.0               | 1.0               | 1.0              |
| Skilled nursing facility                                    | 1.8 (1.0 – 3.1)* | -                | -                 | 0.8 (0.2 – 2.8)   | 1.8 (1.0 – 3.4)  |
| WHO score at ICU Admission, mean difference (95% CI)        | 0.4 (0.2 – 0.5)* | 0.2 (-0.1 – 0.3) | 0.3 (0.1 – 0.6)*  | 0.2 (-0.1 – 0.4)  | 0.1 (-0.2 – 0.4) |
| McCabe Score at ICU Admission, mean difference (95% CI)     | 0.4 (0.3 – 0.5)* | 0.3 (0.2 – 0.4)* | 0.3 (0.1 – 0.4)*  | 0.3 (0.2 – 0.5)*  | 0.2 (0.02 – 0.4) |
| APACHE II score, mean difference (95% CI)                   | 5.8 (5.1 – 6.5)* | 6.4 (5.3 – 7.5)* | 6.6 (4.7 – 8.5)*  | 4.3 (2.9 – 5.8)*  | 4.2 (2.7 – 5.7)* |
| MOD score, mean difference (95% CI)                         | 0.9 (0.4 – 1.3)* | 1.8 (1.1 – 2.5)* | 1.3 (0.00 – 2.6)* | 0.2 (-0.9 – 1.2)  | 0.2 (-1.3 – 1.0) |
| Injury Severity Score, mean difference (95% CI)             | 2.7 (0.5 – 4.9)* | 2.5 (0.0 – 5.0)* | 3.1 (-1.4 – 7.8)  | -                 | -                |
| Probability of trauma survival, mean difference (95% CI), % | -19 (-25 – -13)* | -19 (-26 – -12)* | -20 (-32 – -7.0)* | -                 | -                |

|                                                                                                                                                                                                                                                                                                                                                   |                  |                    |                    |                  |                  |
|---------------------------------------------------------------------------------------------------------------------------------------------------------------------------------------------------------------------------------------------------------------------------------------------------------------------------------------------------|------------------|--------------------|--------------------|------------------|------------------|
| DNR status at time of ICU admission, RR (95% CI)                                                                                                                                                                                                                                                                                                  | 4.5 (3.4 – 5.9)* | 6.0 (1.1 – 9.0)*   | -                  | 3.6 (2.4 – 5.3)* | 3.6 (2.2 – 6.0)* |
| Blood cell product transfusion, RR (95% CI)                                                                                                                                                                                                                                                                                                       | 1.5 (1.1 – 1.9)* | 1.2 (0.8 – 1.8)    | 1.3 (0.6 – 2.9)    | 1.7 (1.0 – 3.0)* | 1.7 (1.0 – 2.8)  |
| Required mechanical ventilation, RR (95% CI)                                                                                                                                                                                                                                                                                                      | 1.2 (0.8 – 1.6)  | 1.4 (0.7 – 3.1)    | 1.7 (0.4 – 6.6)    | 1.2 (0.7 – 2.1)  | 1.1 (0.6 – 2.0)  |
| Length of stay, mean difference (95% CI), days                                                                                                                                                                                                                                                                                                    |                  |                    |                    |                  |                  |
| ICU length of stay                                                                                                                                                                                                                                                                                                                                | 3.9 (1.7 – 6.0)* | -1.2 (-3.1 – 0.7)  | -2.8 (-5.8 – 0.1)  | 3.9 (1.2 – 6.7)* | 13 (3.7 – 22)*   |
| Hospital length of stay                                                                                                                                                                                                                                                                                                                           | 0.3 (-3.3 – 3.9) | -9.0 (-14 – -3.7)* | -9.8 (-15 – -4.4)* | 1.8 (-5.5 – 9.2) | 10 (-1.3 – 21)   |
| Infection, RR (95% CI)                                                                                                                                                                                                                                                                                                                            |                  |                    |                    |                  |                  |
| Patients with infections acquired in the ICU                                                                                                                                                                                                                                                                                                      | 1.3 (1.1 – 1.6)* | 1.0 (0.7 – 1.3)    | 0.7 (0.4 – 1.3)    | 1.8 (1.3 – 2.6)* | 2.0 (1.3 – 2.9)* |
| Patients treated for pneumonia acquired in the ICU                                                                                                                                                                                                                                                                                                | 1.1 (0.9 – 1.3)  | 0.7 (0.5 – 1.0)*   | 0.8 (0.4 – 1.7)    | 1.8 (1.3 – 2.5)* | 1.8 (1.2 – 2.6)* |
| Abbreviations: ICU, intensive care unit; SD, standard deviation; CI, confidence interval; RR, relative risk or risk ratio; BMI, body mass index; MOD, Marshall or multiple organ dysfunction; WHO, World Health Organization; APACHE, acute physiology and chronic health evaluation; DNR, do not resuscitate; NIH, National Institutes of Health |                  |                    |                    |                  |                  |

\* Significant differences between non-survivors and survivors

# Risk ratios are not calculated if all events occurred in one group

† Referent group

**Supplemental Table E.** Proportion of cytokine levels above the lowest measured concentration (2.7pg/ml) for male and female for both trauma and non-trauma populations

|               | Trauma       |                |              | Non-Trauma   |                |         |
|---------------|--------------|----------------|--------------|--------------|----------------|---------|
|               | Male (n=746) | Female (n=276) | p value      | Male (n=335) | Female (n=298) | p value |
| IL-1          | 275 (36.8)   | 94 (34.1)      | 0.41         | 99 (29.6)    | 75 (25.2)      | 0.22    |
| IL-2          | 405 (54.3)   | 128 (46.4)     | <b>0.025</b> | 177 (52.8)   | 147 (49.3)     | 0.38    |
| IL-4          | 625 (83.8)   | 224 (81.2)     | 0.32         | 268 (80.0)   | 245 (82.2)     | 0.49    |
| IL-6          | 715 (95.8)   | 268 (97.1)     | 0.35         | 315 (94.0)   | 281 (94.3)     | 0.89    |
| IL-8          | 670 (89.8)   | 245 (88.8)     | 0.63         | 298 (89.0)   | 261 (87.6)     | 0.59    |
| IL-10         | 722 (96.7)   | 265 (96.0)     | 0.55         | 326 (97.3)   | 291 (97.7)     | 0.79    |
| IL-12         | 363 (48.6)   | 112 (40.6)     | <b>0.022</b> | 151 (45.1)   | 134 (45.0)     | 0.98    |
| IFN- $\gamma$ | 417 (55.9)   | 132 (47.8)     | <b>0.022</b> | 143 (42.7)   | 127 (42.6)     | 0.99    |
| GM-CSF        | 454 (60.9)   | 153 (55.4)     | 0.12         | 177 (52.8)   | 141 (47.3)     | 0.17    |
| TNF- $\alpha$ | 525 (70.6)   | 188 (68.6)     | 0.53         | 259 (77.3)   | 222 (74.5)     | 0.75    |

Abbreviations: IL, interleukin; IFN, interferon; GM-CSF, granulocyte macrophage-colony stimulating factor; TNF, tumor necrosis factor  
Values reported as N (%)

**Supplemental Table F.** Mean initial ICU cytokine levels for patients who lived and died for both trauma and non-trauma populations

|        | Trauma        |              |               | Non-Trauma    |              |              |
|--------|---------------|--------------|---------------|---------------|--------------|--------------|
|        | Lived (n=913) | Died (n=109) | p value       | Lived (n=492) | Died (n=141) | p value      |
| IL-1   | 8.5 ± 14.3    | 25.4 ± 55.1  | 0.23          | 8.0 ± 19.9    | 7.9 ± 12.6   | 0.91         |
| IL-2   | 15.7 ± 48.3   | 25.4 ± 102   | 0.33          | 17.8 ± 95.7   | 15.1 ± 27.2  | 0.59         |
| IL-4   | 229 ± 565     | 340 ± 575    | 0.52          | 192 ± 439     | 311 ± 630    | <b>0.036</b> |
| IL-6   | 355 ± 765     | 770 ± 1457   | <b>0.0042</b> | 410 ± 876     | 448 ± 1215   | <b>0.030</b> |
| IL-8   | 77.9 ± 303    | 132 ± 316    | 0.079         | 92.5 ± 258    | 229 ± 740    | <b>0.032</b> |
| IL-10  | 183 ± 553     | 201 ± 619    | 0.76          | 347 ± 1007    | 340 ± 761    | 0.93         |
| IL-12  | 15.8 ± 59.4   | 12.6 ± 29.6  | 0.34          | 62.7 ± 461    | 15.0 ± 30.9  | <b>0.023</b> |
| IFN-γ  | 19.5 ± 84.5   | 20.9 ± 57.9  | 0.82          | 18.8 ± 122    | 78.0 ± 529   | 0.19         |
| GM-CSF | 12.0 ± 36.5   | 10.8 ± 19.6  | 0.60          | 9.5 ± 30.8    | 17.9 ± 55.5  | 0.086        |
| TNF-α  | 15.8 ± 196    | 10.1 ± 9.8   | 0.38          | 14.1 ± 25.3   | 24.2 ± 64.6  | 0.070        |

Abbreviations: IL, interleukin; IFN, interferon; GM-CSF, granulocyte macrophage-colony stimulating factor; TNF, tumor necrosis factor

Values reported as Mean ± SD.
